# Supplementary material
Source: PubMed Central journal article supplement (PMC2695631)
Supplement: 90958.2008_1.pdf [file 90958.2008_1.pdf]

Supplemental material

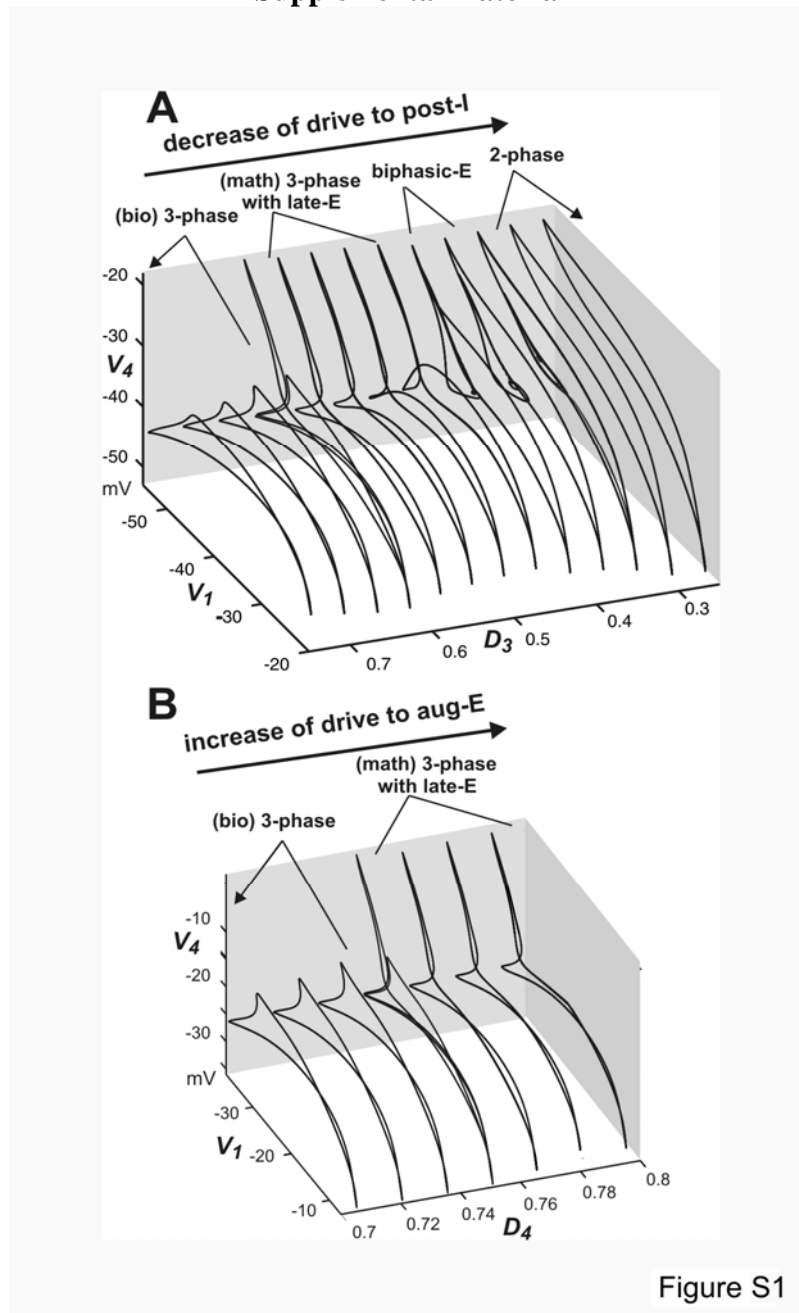

Figure S1

**FIG. S1.** Dynamics of state transitions with progressive change in drive to one neuron. The state transitions in both **A** and **B** are represented by 3D diagrams with two axes showing changes in membrane potentials of pre-I ( $V_1$ ) and aug-E ( $V_4$ ) neurons and the third axis representing changing (dimensionless) drive. **A:** Transition from the “bio” three-phase pattern to the two-phase pattern with progressive change of drive to post-I neuron ( $D_3$ ); this diagram shows the same transformations as those shown in Fig. 11. **B:** Transition from the “bio” three-phase pattern to the “math” three-phase pattern with progressive change of drive to aug-E neuron ( $D_4$ ).

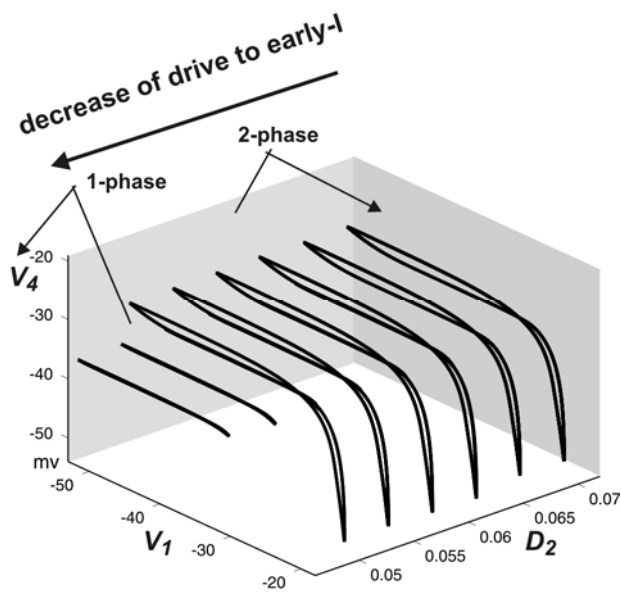

Figure S2

**FIG. S2.** Dynamics of state transitions from two-phase oscillations to one-phase oscillations. The state transitions are represented by a 3D diagram with two axes showing changes in membrane potentials of pre-I ( $V_1$ ) and aug-E ( $V_4$ ) neurons and the third axis representing changing (dimensionless) drive to early-I neuron ( $D_2$ ); this diagram shows the same transformations as those shown in Fig. 14.
